# Supplementary material for: Formation of Solid Solutions and Physicochemical Properties of the High-Entropy Ln1−xSrx(Co,Cr,Fe,Mn,Ni)O3−δ (Ln = La, Pr, Nd, Sm or Gd) Perovskites
Source: MDPI journal article supplement (doi:10.3390/ma14185264), 2021-09-13
Supplement: s1 [file s1]

Supplementary Material

# Formation of Solid Solutions and Physicochemical Properties of the High-Entropy $\text{Ln}_{1-x}\text{Sr}_x(\text{Co,Cr,Fe,Mn,Ni})\text{O}_{3-\delta}$ ( $\text{Ln} = \text{La, Pr, Nd, Sm or Gd}$ ) Perovskites

Juliusz Dąbrowa <sup>1,\*</sup>, Klaudia Zielińska <sup>2,\*</sup>, Anna Stępień <sup>2</sup>, Marek Zajusz <sup>1</sup>, Margarita Nowakowska <sup>1</sup>, Maciej Moździerz <sup>2</sup>, Katarzyna Berent <sup>3</sup>, Maria Szymczak <sup>1</sup> and Konrad Świerczek <sup>2,4</sup>

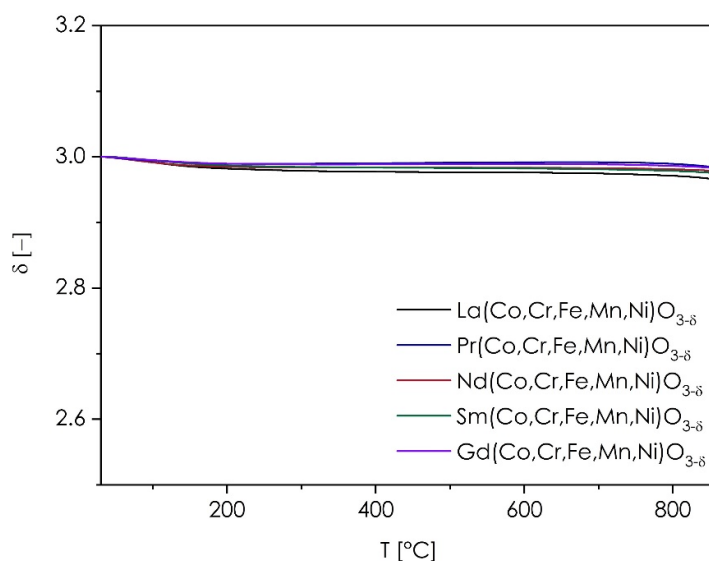

**Figure S1.** Results of the TG measurement for  $\text{Ln}(\text{Co,Cr,Fe,Mn,Ni})\text{O}_{3-\delta}$  materials.

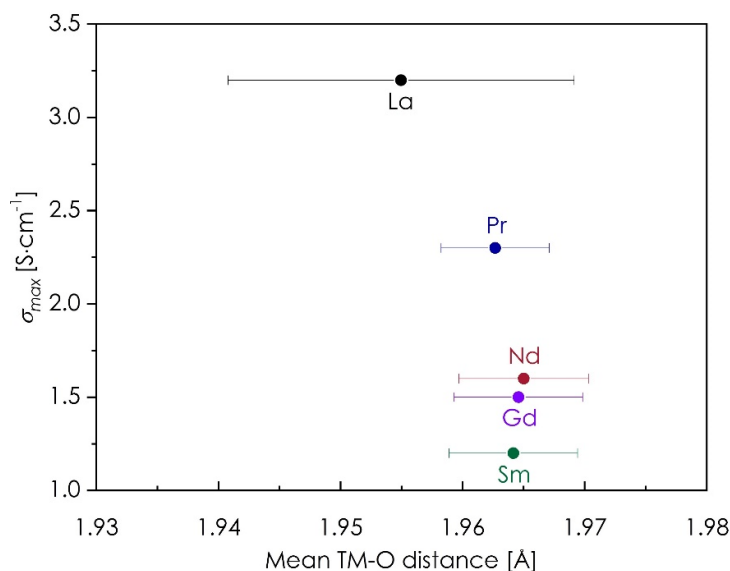

**Figure S2.** The average TM-O distance vs the maximum value of electrical conductivity for  $\text{Ln}(\text{Co,Cr,Fe,Mn,Ni})\text{O}_{3-\delta}$  series. The spreads resulting from the presence of multiple types of TM-O bonds in the distorted perovskite structures are also presented.

**Table S1.** The results of the Rietveld refinement with the procedure's residuals for the  $\text{Ln}_{1-x}\text{Sr}_x(\text{Co,Cr,Fe,Mn,Ni})\text{O}_{3-\delta}$  (Ln = La, Pr, Nd, Sm, Gd) series – as-calcined powders.

| La-based series [1]                                               |               |      |           |           |           |                       |           |         |      |
|-------------------------------------------------------------------|---------------|------|-----------|-----------|-----------|-----------------------|-----------|---------|------|
|                                                                   | Phase         | Wt%  | $a$ [Å]   | $b$ [Å]   | $c$ [Å]   | $V$ [Å <sup>3</sup> ] | $a_0$ [Å] | Rwp [%] | Gof  |
| $\text{La}(\text{Co,Cr,Fe,Mn,Ni})\text{O}_3$                      | $R\text{-}3c$ | 100  | 5.5086(2) |           | 13.371(1) | 58.563(6)             | 3.8834(1) | 2.82    | 1.05 |
| $\text{La}_{0.9}\text{Sr}_{0.1}(\text{Co,Cr,Fe,Mn,Ni})\text{O}_3$ | $R\text{-}3c$ | 100  | 5.5052(3) |           | 13.363(1) | 58.454(8)             | 3.8809(1) | 2.88    | 1.20 |
| $\text{La}_{0.8}\text{Sr}_{0.2}(\text{Co,Cr,Fe,Mn,Ni})\text{O}_3$ | $R\text{-}3c$ | 100  | 5.4997(3) |           | 13.346(1) | 58.27(1)              | 3.8768(1) | 2.74    | 1.18 |
| $\text{La}_{0.7}\text{Sr}_{0.3}(\text{Co,Cr,Fe,Mn,Ni})\text{O}_3$ | $R\text{-}3c$ | 100  | 5.5063(3) |           | 13.362(2) | 58.47(1)              | 3.8814(1) | 2.86    | 0.96 |
| $\text{La}_{0.6}\text{Sr}_{0.4}(\text{Co,Cr,Fe,Mn,Ni})\text{O}_3$ | $R\text{-}3c$ | -    | 5.5067(6) |           | 13.372(3) | 58.53(2)              | 3.8826(1) | 2.82    | 1.50 |
| $\text{La}_{0.5}\text{Sr}_{0.5}(\text{Co,Cr,Fe,Mn,Ni})\text{O}_3$ | $R\text{-}3c$ | -    | 5.5049(7) |           | 13.380(4) | 58.53(2)              | 3.8826(1) | 2.97    | 1.82 |
| Pr-based series                                                   |               |      |           |           |           |                       |           |         |      |
|                                                                   | Phase         | Wt%  | $a$ [Å]   | $b$ [Å]   | $c$ [Å]   | $V$ [Å <sup>3</sup> ] | $a_0$ [Å] | Rwp     | Gof  |
| $\text{Pr}(\text{Co,Cr,Fe,Mn,Ni})\text{O}_3$                      | $Pbnm$        | 100  | 7.6952(3) | 5.4713(2) | 5.4405(2) | 57.264(4)             | 3.8544(1) | 3.11    | 3.18 |
| $\text{Pr}_{0.9}\text{Sr}_{0.1}(\text{Co,Cr,Fe,Mn,Ni})\text{O}_3$ | $Pbnm$        | 98.5 | 7.6936(4) | 5.4647(3) | 5.4410(3) | 57.185(5)             | 3.8527(1) | 3.09    | 3.62 |
|                                                                   | $P21/n$       | 1.5  | 7.08(1)   | 7.69(2)   | 6.6993(3) |                       |           |         |      |
| $\text{Pr}_{0.8}\text{Sr}_{0.2}(\text{Co,Cr,Fe,Mn,Ni})\text{O}_3$ | $Pbnm$        | 96.0 | 7.6979(8) | 5.4474(6) | 5.4382(5) | 57.011(9)             | 3.8488(2) | 3.54    | 5.35 |
|                                                                   | $P21/n$       | 4.0  | 7.1165(6) | 7.6624(8) | 6.8033(5) |                       |           |         |      |
| Nd-based series                                                   |               |      |           |           |           |                       |           |         |      |
|                                                                   | Phase         | Wt%  | $a$ [Å]   | $b$ [Å]   | $c$ [Å]   | $V$ [Å <sup>3</sup> ] | $a_0$ [Å] | Rwp     | Gof  |
| $\text{Nd}(\text{Co,Cr,Fe,Mn,Ni})\text{O}_3$                      | $Pbnm$        | 100  | 7.6731(3) | 5.4781(2) | 5.4100(2) | 56.850(3)             | 3.8435(1) | 3.29    | 1.49 |
| $\text{Nd}_{0.9}\text{Sr}_{0.1}(\text{Co,Cr,Fe,Mn,Ni})\text{O}_3$ | $Pbnm$        | 100  | 7.6636(3) | 5.4627(2) | 5.4114(3) | 56.636(5)             | 3.8403(1) | 4.63    | 3.12 |
| $\text{Nd}_{0.8}\text{Sr}_{0.2}(\text{Co,Cr,Fe,Mn,Ni})\text{O}_3$ | $Pbnm$        | 94.3 | 7.6638(5) | 5.4556(3) | 5.4108(3) | 56.557(6)             | 3.8385(1) | 4.33    | 3.12 |
|                                                                   | $P21/n$       | 5.7  | 7.0636(8) | 7.5516(2) | 6.7160(1) |                       |           |         |      |
| Sm-based series                                                   |               |      |           |           |           |                       |           |         |      |
|                                                                   | Phase         | Wt%  | $a$ [Å]   | $b$ [Å]   | $c$ [Å]   | $V$ [Å <sup>3</sup> ] | $a_0$ [Å] | Rwp     | Gof  |
| $\text{Sm}(\text{Co,Cr,Fe,Mn,Ni})\text{O}_3$                      | $Pbnm$        | 100  | 7.6171(4) | 5.5061(3) | 5.3523(2) | 56.120(4)             | 3.8285(1) | 2.57    | 1.23 |
| $\text{Sm}_{0.9}\text{Sr}_{0.1}(\text{Co,Cr,Fe,Mn,Ni})\text{O}_3$ | $Pbnm$        | 97.2 | 7.6159(3) | 5.5040(2) | 5.3530(2) | 56.097(4)             | 3.8281(1) | 2.53    | 1.25 |
|                                                                   | $P21/n$       | 2.7  | 7.3306(2) | 7.0044(2) | 5.5982(2) |                       |           |         |      |
| Gd-based series                                                   |               |      |           |           |           |                       |           |         |      |
|                                                                   | Phase         | Wt%  | $a$ [Å]   | $b$ [Å]   | $c$ [Å]   | $V$ [Å <sup>3</sup> ] | $a_0$ [Å] | Rwp     | Gof  |
| $\text{Gd}(\text{Co,Cr,Fe,Mn,Ni})\text{O}_3$                      | $Pbnm$        | 100  | 7.5725(4) | 5.5371(3) | 5.2967(2) | 55.526(4)             | 3.8150(1) | 2.08    | 1.21 |
| $\text{Gd}_{0.9}\text{Sr}_{0.1}(\text{Co,Cr,Fe,Mn,Ni})\text{O}_3$ | $Pbnm$        | 100  | 7.5690(4) | 5.5360(3) | 5.5293(3) | 55.481(5)             | 3.8140(1) | 2.22    | 1.40 |
|                                                                   |               |      |           |           |           |                       |           |         |      |
| $\text{Gd}_{0.8}\text{Sr}_{0.2}(\text{Co,Cr,Fe,Mn,Ni})\text{O}_3$ | $Pbnm$        | 98.3 | 7.571(4)  | 5.5288(3) | 5.3016(3) | 55.478(5)             | 3.3139(1) | 1.89    | 1.09 |
|                                                                   | $P21/n$       | 1.7  | 7.3213(3) | 6.9956(3) | 5.5927(2) |                       |           |         |      |

**Table S2.** The results of the Rietveld refinement with the procedure's residuals for the  $\text{Ln}_{1-x}\text{Sr}_x(\text{Co,Cr,Fe,Mn,Ni})\text{O}_{3-\delta}$  (Ln = La, Pr, Nd, Sm, Gd) series – pellets quenched after sintering at 1000 °C for 20 h.

|                                                                            | Phase        | Wt%  | $a$ [Å]   | $b$ [Å]   | $c$ [Å]    | $V$ [Å <sup>3</sup> ] | $a_0$ [Å] | Rwp [%] | Gof  |
|----------------------------------------------------------------------------|--------------|------|-----------|-----------|------------|-----------------------|-----------|---------|------|
| <b>La-based series [1]</b>                                                 |              |      |           |           |            |                       |           |         |      |
| $\text{La}(\text{Co,Cr,Fe,Mn,Ni})\text{O}_3$                               | <i>Pbnm</i>  | 100  | 7.7472(2) | 5.5116(1) | 5.4671(1)  | 58.360(2)             | 3.8789(1) | 7.17    | 2.01 |
| $\text{La}_{0.9}\text{Sr}_{0.1}(\text{Co,Cr,Fe,Mn,Ni})\text{O}_{3-\delta}$ | <i>R-3c</i>  | 100  | 5.4966(1) |           | 13.2676(2) | 57.858(2)             | 3.8677(1) | 8.38    | 2.96 |
| $\text{La}_{0.8}\text{Sr}_{0.2}(\text{Co,Cr,Fe,Mn,Ni})\text{O}_{3-\delta}$ | <i>R-3c</i>  | 100  | 5.4845(1) |           | 13.2785(4) | 57.651(3)             | 3.8631(1) | 7.38    | 2.33 |
| $\text{La}_{0.7}\text{Sr}_{0.3}(\text{Co,Cr,Fe,Mn,Ni})\text{O}_{3-\delta}$ | <i>R-3c</i>  | 100  | 5.4738(1) |           | 13.2814(4) | 57.480(3)             | 3.8693(1) | 6.95    | 2.3  |
| $\text{La}_{0.6}\text{Sr}_{0.4}(\text{Co,Cr,Fe,Mn,Ni})\text{O}_{3-\delta}$ | <i>R-3c</i>  | 94.2 | 5.4688(2) |           | 13.3014(5) | 57.420(4)             | 3.8579(1) |         |      |
|                                                                            | <i>R-3m</i>  | 4.6  | 5.542(2)  |           | 20.252(3)  |                       |           | 6.08    | 1.62 |
|                                                                            | <i>Fm-3m</i> | 1.2  | 4.1825(5) |           |            |                       |           |         |      |
| $\text{La}_{0.5}\text{Sr}_{0.5}(\text{Co,Cr,Fe,Mn,Ni})\text{O}_{3-\delta}$ | <i>R-3c</i>  | 87.1 | 5.4648(2) |           | 13.3224(8) | 57.427(5)             | 3.8581(1) |         |      |
|                                                                            | <i>R-3m</i>  | 10.6 | 5.586(6)  |           | 20.238(4)  |                       |           | 6.23    | 1.98 |
|                                                                            | <i>Fm-3m</i> | 2.3  | 4.1826(2) |           |            |                       |           |         |      |
| <b>Pr-based series</b>                                                     |              |      |           |           |            |                       |           |         |      |
| $\text{Pr}(\text{Co,Cr,Fe,Mn,Ni})\text{O}_3$                               | <i>Pbnm</i>  | 100  | 7.6976(1) | 5.4673(1) | 5.4413(1)  | 57.249(1)             | 3.8541(1) | 3.44    | 4.31 |
| $\text{Pr}_{0.9}\text{Sr}_{0.1}(\text{Co,Cr,Fe,Mn,Ni})\text{O}_3$          | <i>Pbnm</i>  | 100  | 7.6889(1) | 5.4416(1) | 5.4463(1)  | 56.969(7)             | 3.8478(1) | 3.39    | 4.94 |
| $\text{Pr}_{0.8}\text{Sr}_{0.2}(\text{Co,Cr,Fe,Mn,Ni})\text{O}_3$          | <i>Pbnm</i>  | 96.2 | 7.6833(1) | 5.4375(1) | 5.4456(1)  | 56.876(2)             | 3.8457(4) | 3.21    | 4.43 |
|                                                                            | <i>P21/n</i> | 3.8  | 7.118(8)  | 7.739(7)  | 6.701(1)   |                       |           |         |      |
| <b>Nd-based series</b>                                                     |              |      |           |           |            |                       |           |         |      |
| $\text{Nd}(\text{Co,Cr,Fe,Mn,Ni})\text{O}_3$                               | <i>Pbnm</i>  | 100  | 7.6727(1) | 5.4751(1) | 5.4098(1)  | 56.814(1)             | 3.8443(1) | 3.87    | 2.37 |
| $\text{Nd}_{0.9}\text{Sr}_{0.1}(\text{Co,Cr,Fe,Mn,Ni})\text{O}_{3-\delta}$ | <i>Pbnm</i>  | 100  | 7.6691(1) | 5.4525(1) | 5.4178(1)  | 56.637(2)             | 3.8403(1) | 4.04    | 2.77 |
| $\text{Nd}_{0.8}\text{Sr}_{0.2}(\text{Co,Cr,Fe,Mn,Ni})\text{O}_{3-\delta}$ | <i>Pbnm</i>  | 95.8 | 7.6673(3) | 5.4473(2) | 5.4183(2)  | 56.577(4)             | 3.8389(1) | 4.78    | 4.03 |
|                                                                            | <i>P21/n</i> | 4.2  | 7.13(2)   | 7.77(1)   | 6.7015(8)  |                       |           |         |      |
| <b>Sm-based series</b>                                                     |              |      |           |           |            |                       |           |         |      |
| $\text{Sm}(\text{Co,Cr,Fe,Mn,Ni})\text{O}_3$                               | <i>Pbnm</i>  | 100  | 7.6178(1) | 5.4986(1) | 5.3533(1)  | 56.060(1)             | 3.8272(1) | 3.02    | 1.93 |
| $\text{Sm}_{0.9}\text{Sr}_{0.1}(\text{Co,Cr,Fe,Mn,Ni})\text{O}_3$          | <i>Pbnm</i>  | 98.2 | 7.6263(3) | 5.4776(2) | 5.3669(2)  | 56.048(4)             | 3.8270(1) | 3.74    | 3.04 |
|                                                                            | <i>P21/n</i> | 1.8  | 7.3391(6) | 7.0064(6) | 5.5998(3)  |                       |           |         |      |
| <b>Gd-based series</b>                                                     |              |      |           |           |            |                       |           |         |      |
| $\text{Gd}(\text{Co,Cr,Fe,Mn,Ni})\text{O}_3$                               | <i>Pbnm</i>  | 100  | 7.5726(1) | 5.5293(1) | 5.2980(1)  | 55.458(1)             | 3.8135(1) | 2.45    | 1.78 |
| $\text{Gd}_{0.9}\text{Sr}_{0.1}(\text{Co,Cr,Fe,Mn,Ni})\text{O}_{3-\delta}$ | <i>Pbnm</i>  | 100  | 7.5782(3) | 5.5111(2) | 5.3093(2)  | 55.435(4)             | 3.8130(1) | 2.79    | 2.31 |
| $\text{Gd}_{0.8}\text{Sr}_{0.2}(\text{Co,Cr,Fe,Mn,Ni})\text{O}_{3-\delta}$ | <i>Pbnm</i>  | 97.7 | 7.5836(3) | 5.5048(2) | 5.3161(2)  | 55.481(4)             | 3.8140(1) | 2.43    | 1.73 |
|                                                                            | <i>P21/n</i> | 2.3  | 7.1227(8) | 7.2674(9) | 6.9344(3)  |                       |           |         |      |

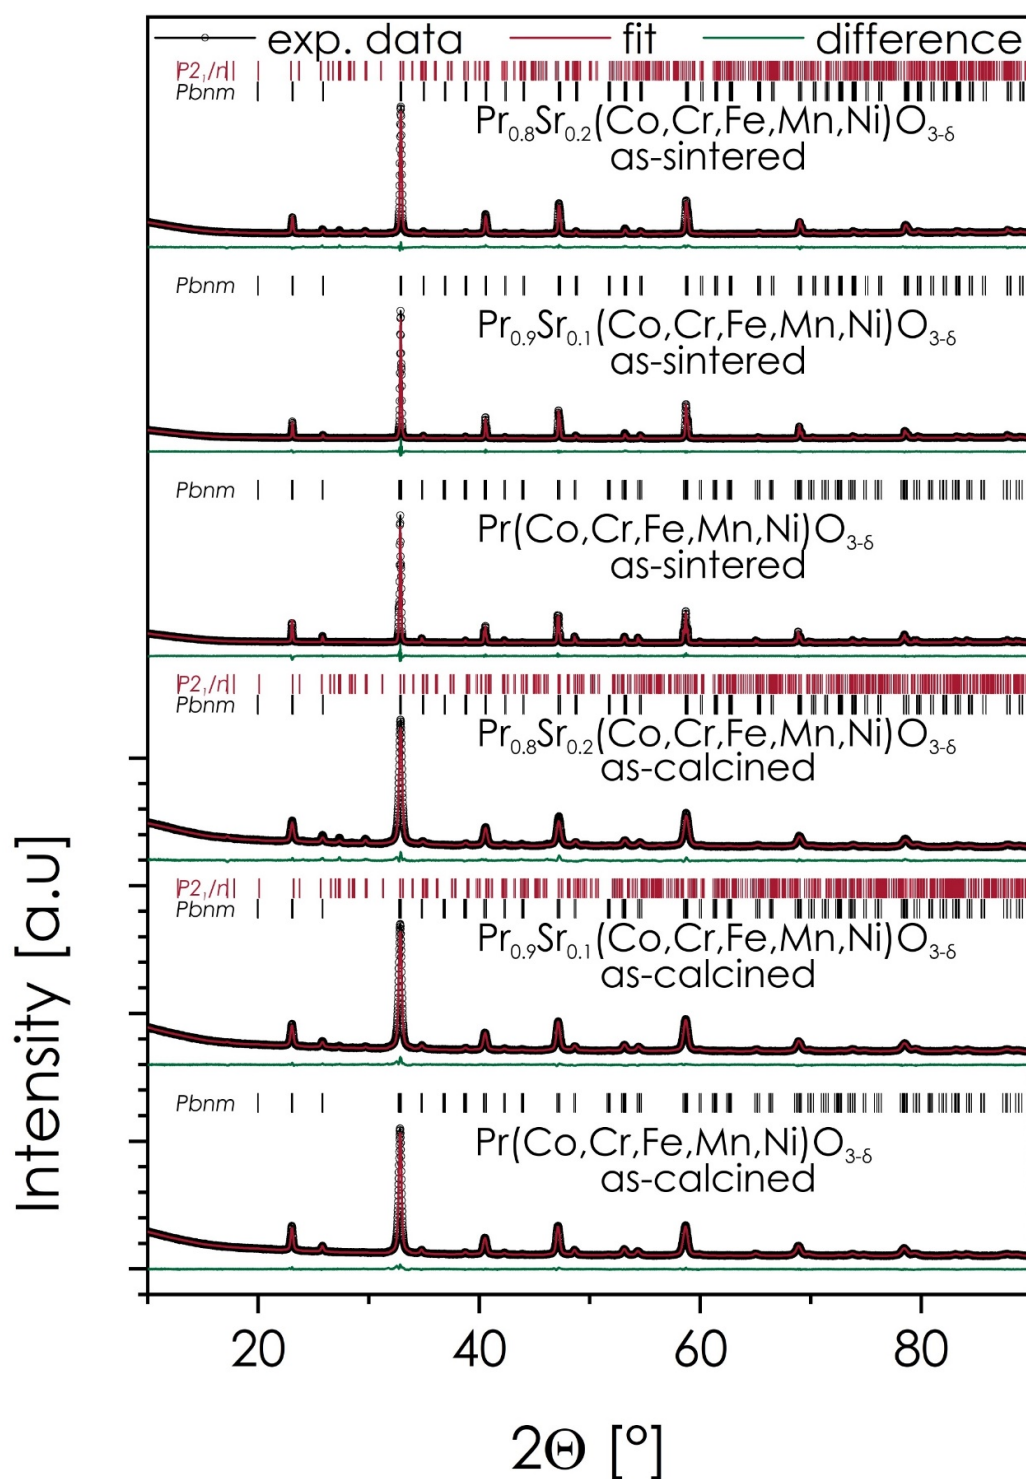

**Figure S3.** XRD diffractograms of the  $\text{Pr}_{1-x}\text{Sr}_x(\text{Co,Cr,Fe,Mn,Ni})\text{O}_{3-\delta}$  series, for both as-calcined powders and pellets, sintered at 1000 °C for 20 h and quenched to RT.

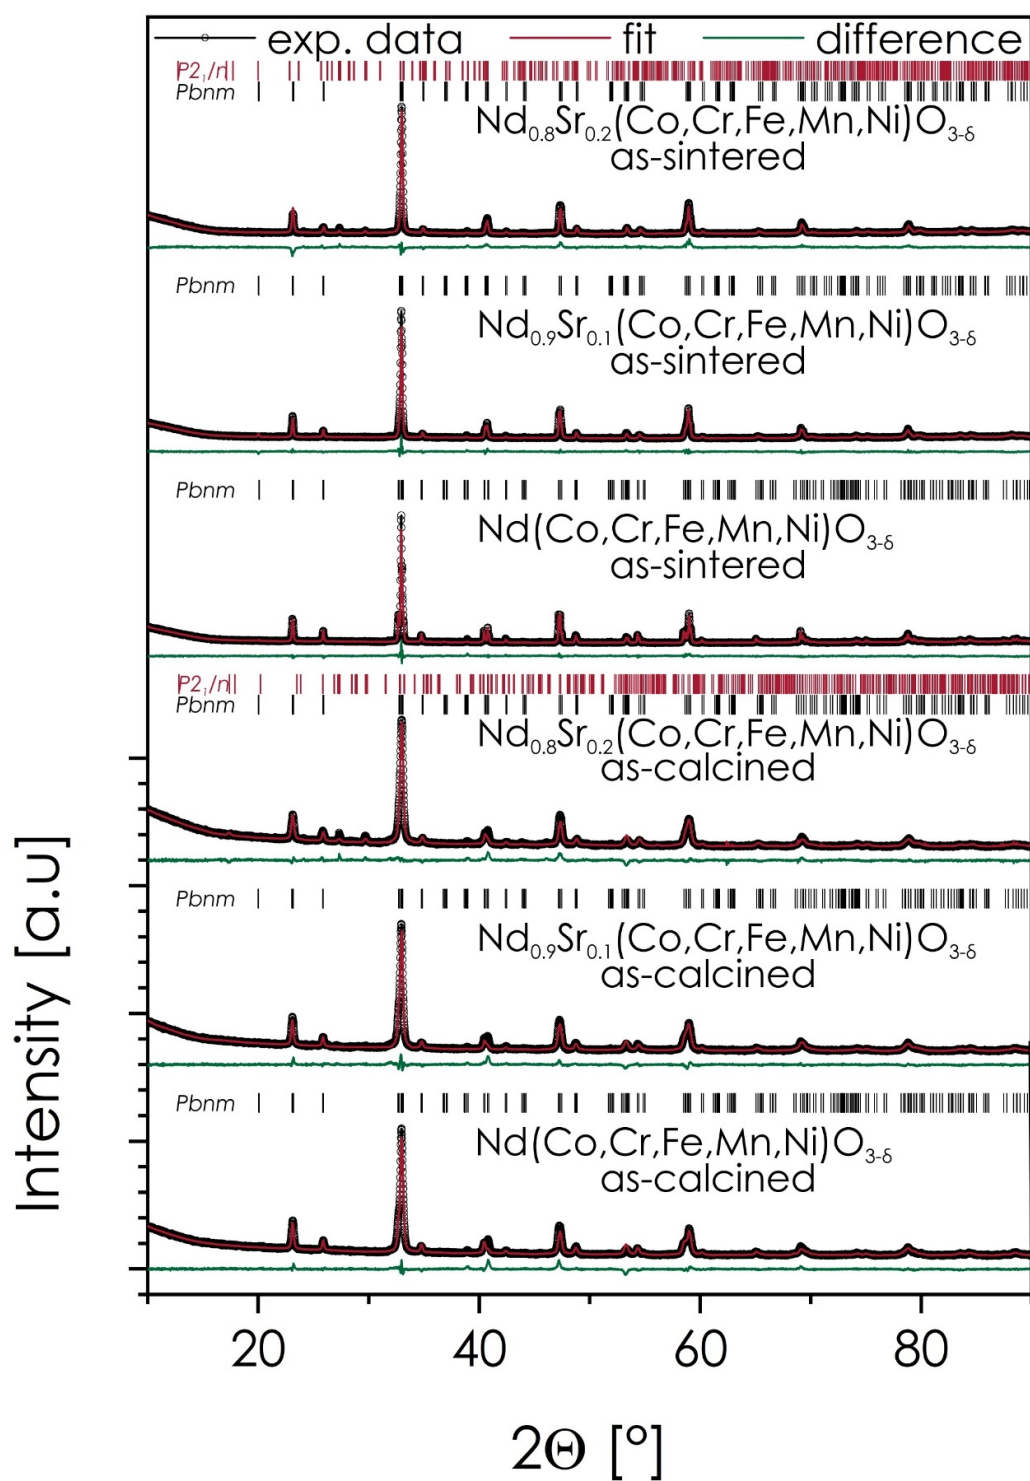

**Figure S4.** XRD diffractograms of the  $\text{Nd}_{1-x}\text{Sr}_x(\text{Co,Cr,Fe,Mn,Ni})\text{O}_{3-\delta}$  series, for both as-calcined powders and pellets, sintered at 1000 °C for 20 h and quenched to RT.

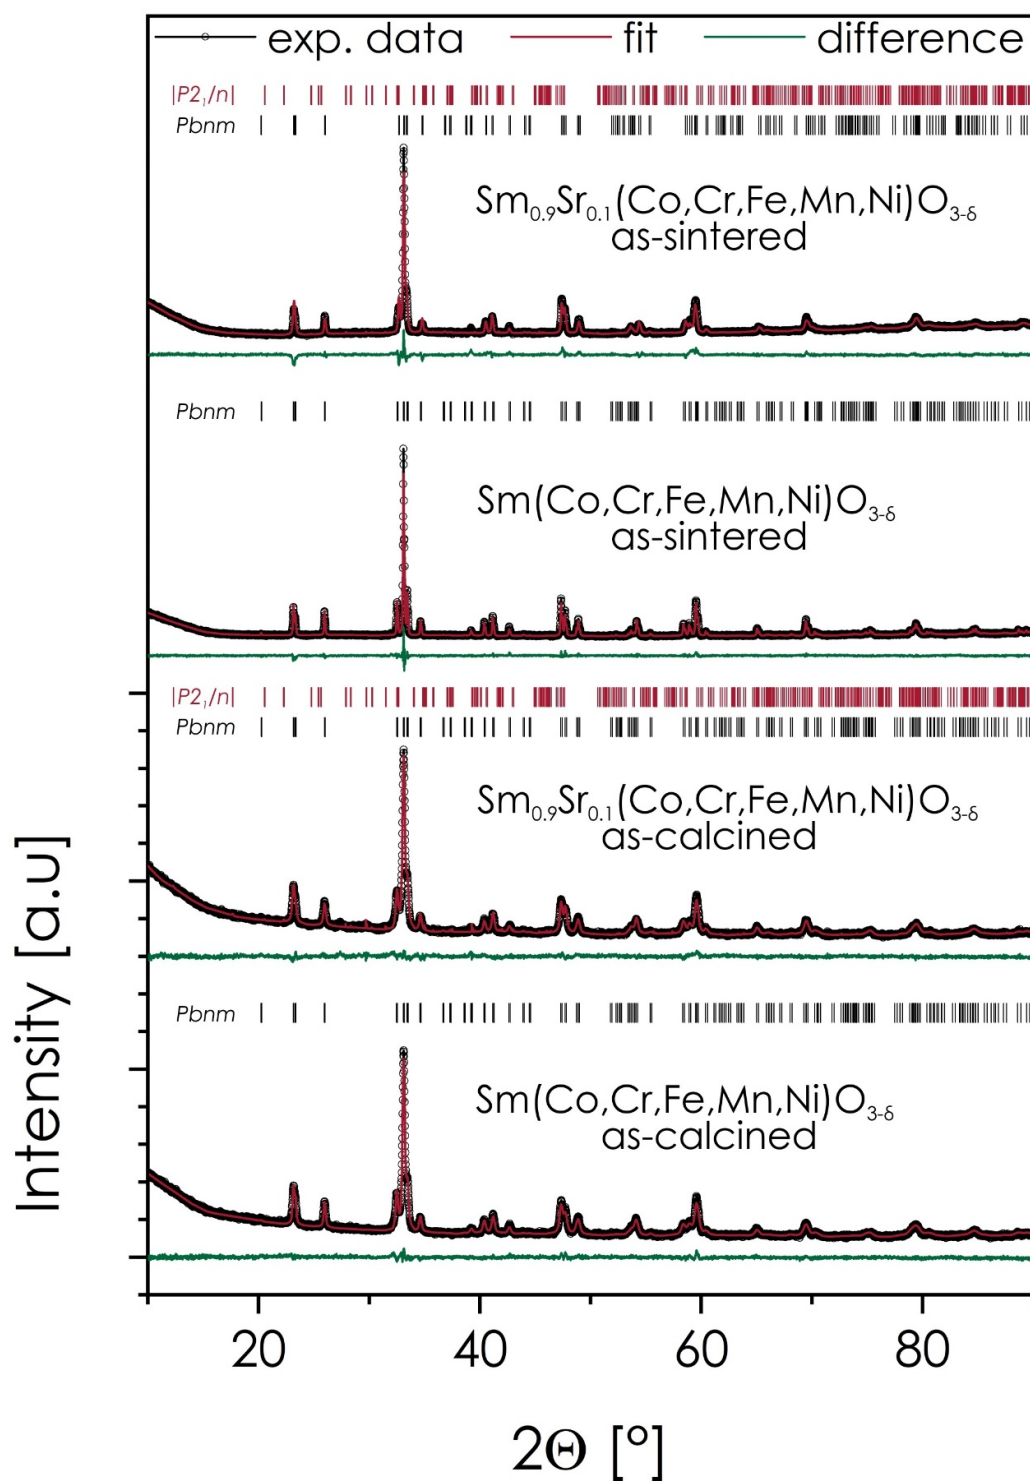

**Figure S5.** XRD diffractograms of the  $\text{Sm}_{1-x}\text{Sr}_x(\text{Co,Cr,Fe,Mn,Ni})\text{O}_{3-\delta}$  series, for both as-calcined powders and pellets, sintered at 1000 °C for 20 h and quenched to RT.

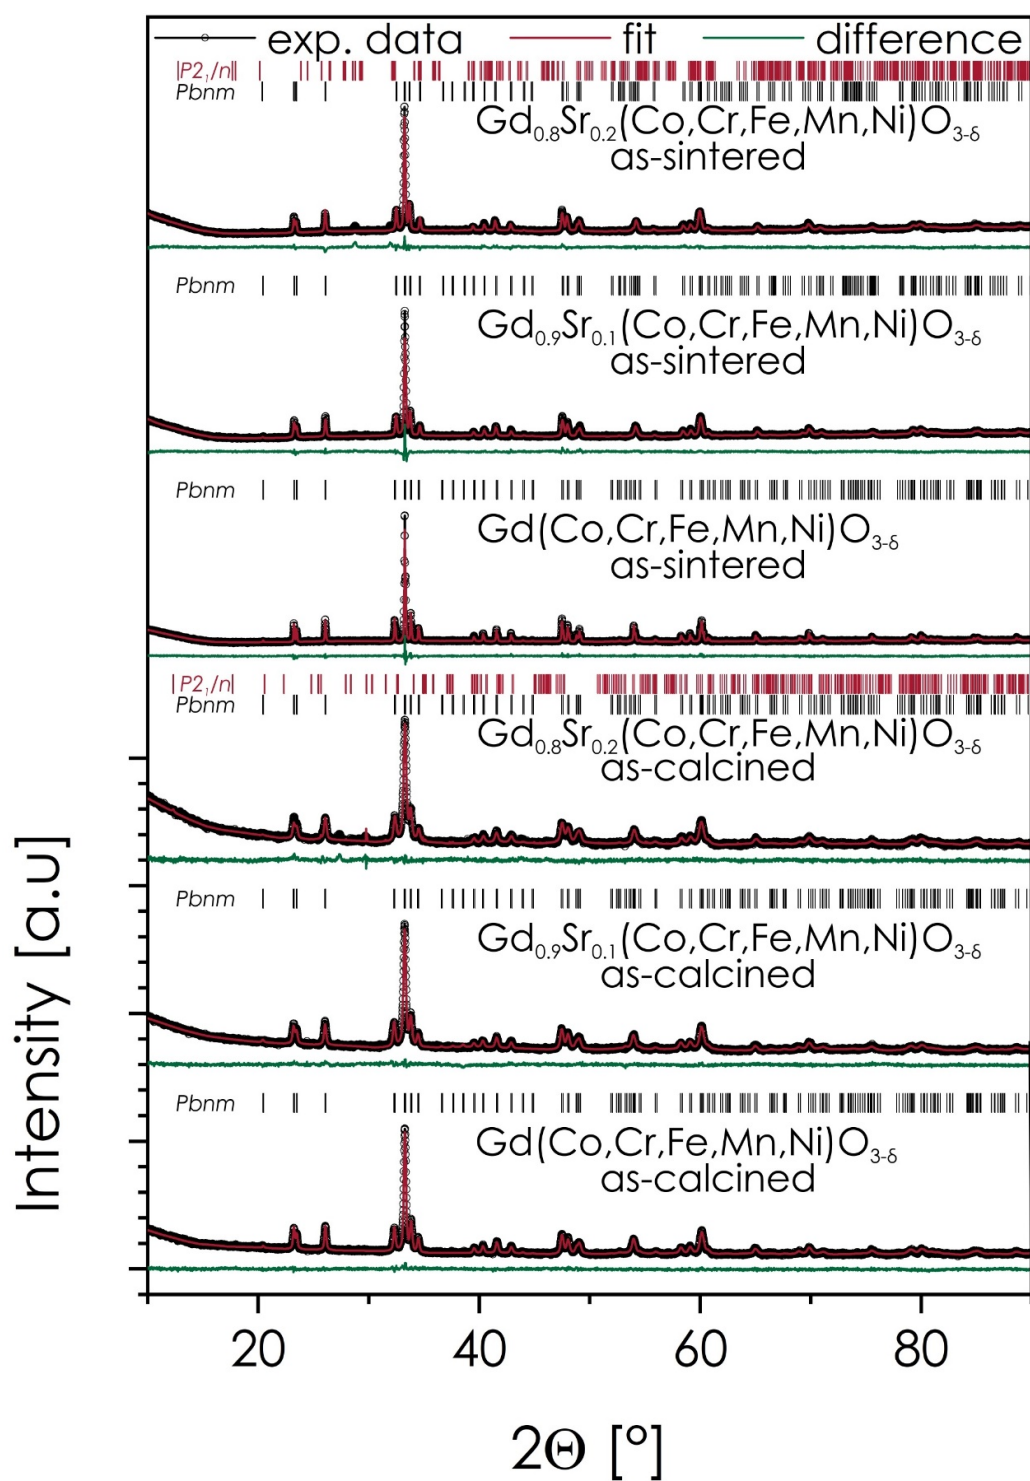

**Figure S6.** XRD diffractograms of the  $\text{Gd}_{1-x}\text{Sr}_x(\text{Co,Cr,Fe,Mn,Ni})\text{O}_{3-\delta}$  series, for both as-calcined powders and pellets, sintered at 1000 °C for 20 h and quenched to RT.



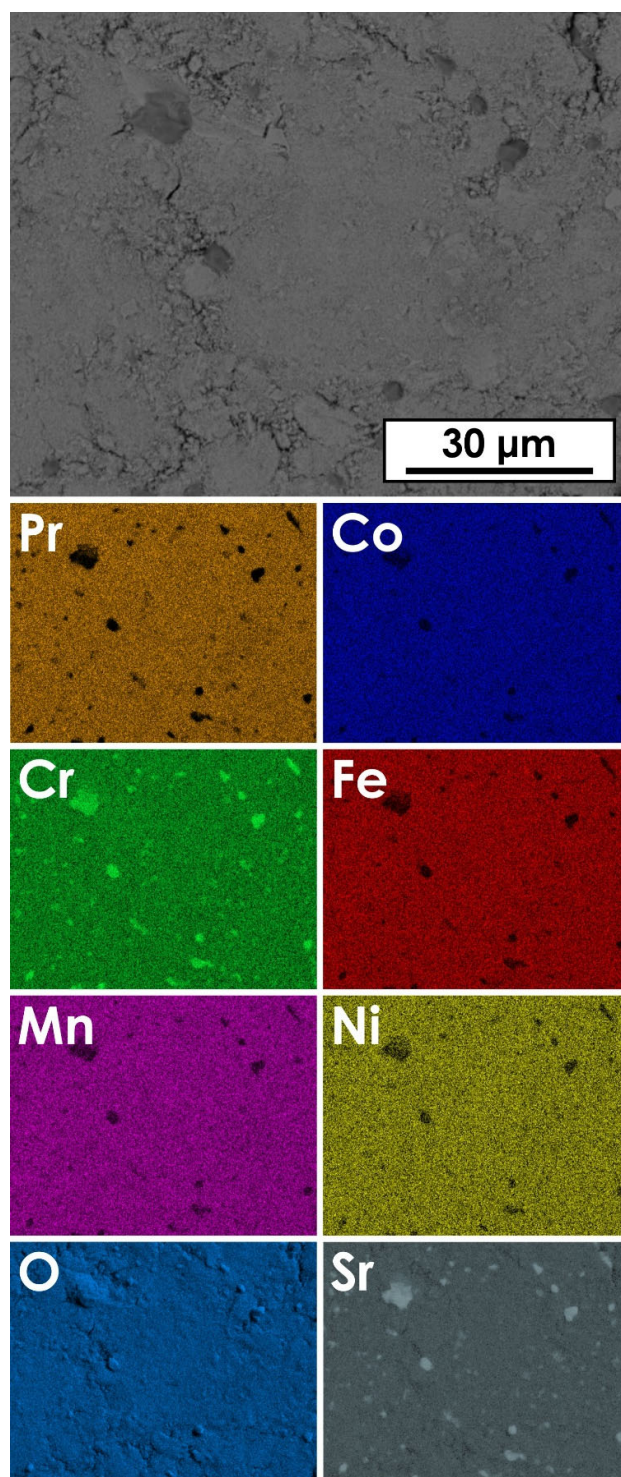

**Figure S7.** Results of the EDS mappings for  $\text{Pr}_{0.8}\text{Sr}_{0.2}(\text{Co,Cr,Fe,Mn,Ni})\text{O}_{3-\delta}$ ; pellet sintered at 1000 °C for 20 h followed by quenching. The formation of secondary phase is clearly visible.
